# Supplementary material
Source: publisher figshare collection journal article supplement (https://aacr.figshare.com/articles/dataset/_/23553159)
Supplement: Supplementary file 1 [file 41323668]

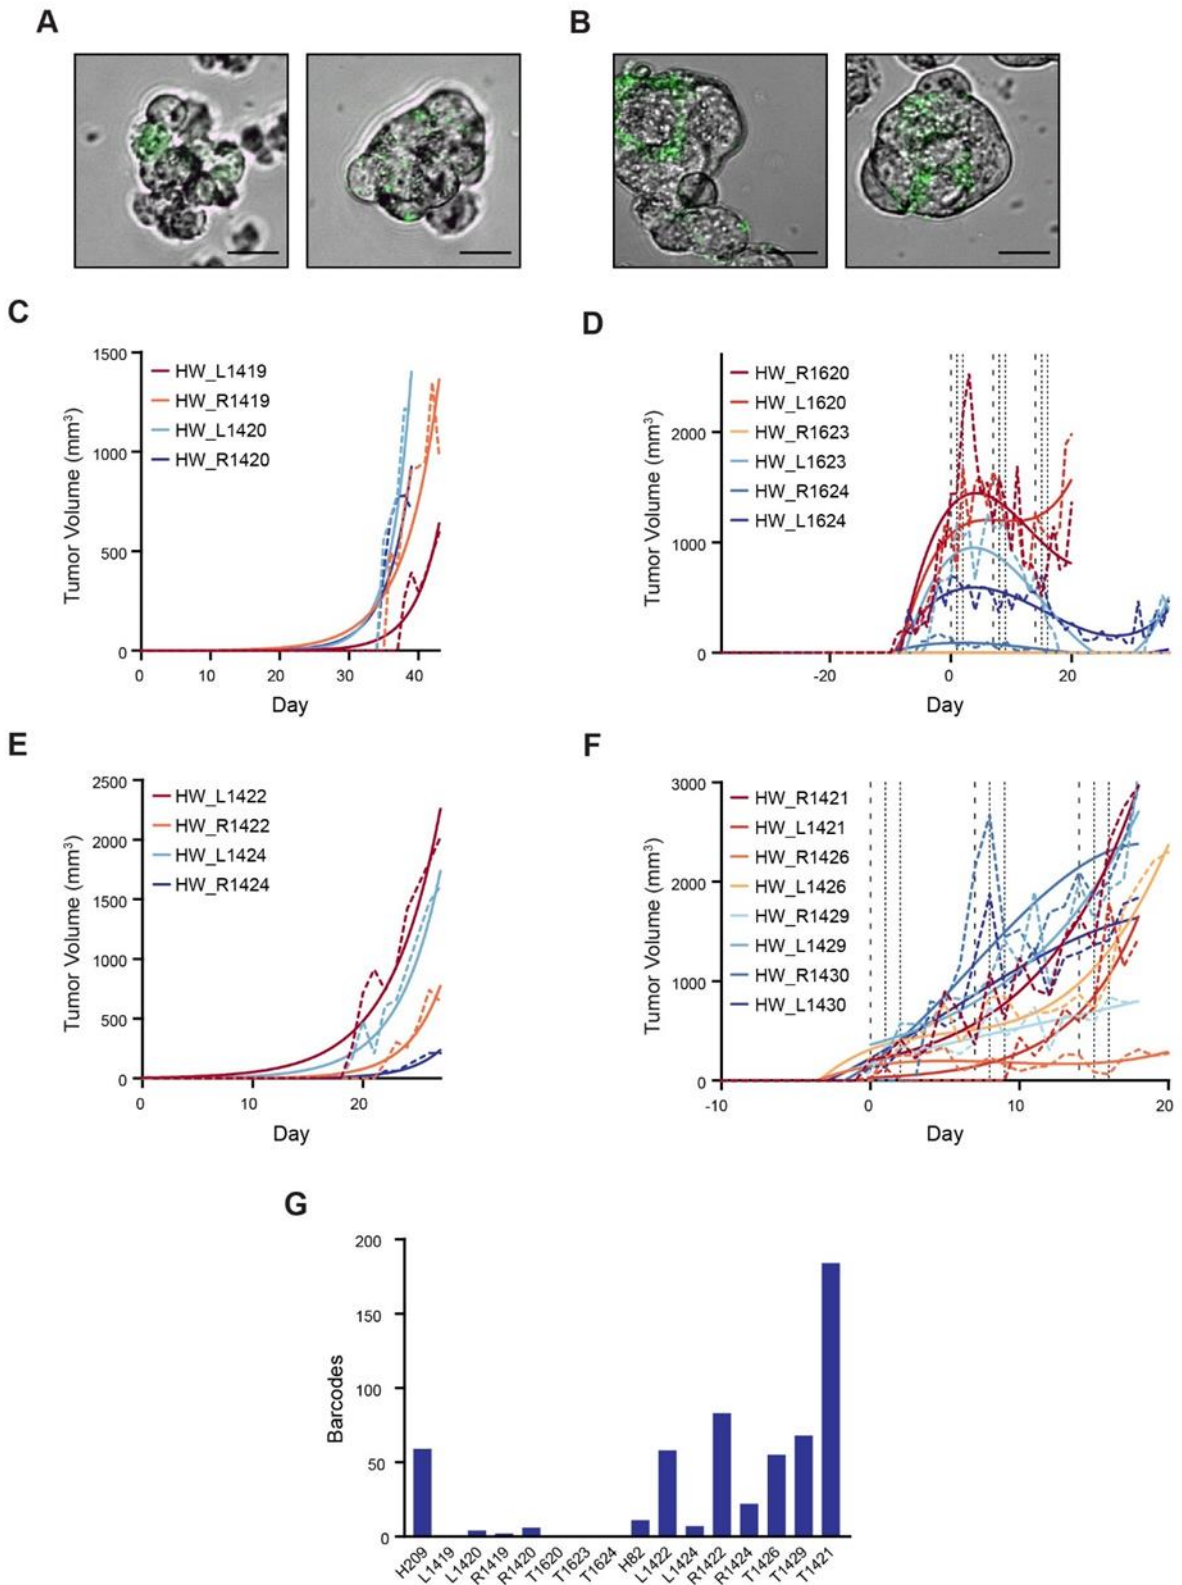

Supplementary Figure S8 | Validation of the LBC labeling and xenograft growth.

Confocal imagery of the NCI-H209 (**A**) and NCI-H82 (**B**) cell lines expressing GFP after transduction with the Retro-LBC virus. Scale bars = 20  $\mu\text{m}$ . Growth of the NCI-H209 xenografts in the primary xenograft without treatment (**C**) and the secondary xenograft during chemotherapy treatment (**D**). Growth of the NCI-H82 xenografts in the primary xenograft without treatment (**E**) and the secondary xenograft during chemotherapy treatment (**F**). Dashed lines represent the measured size of the xenografts and the solid line is the best-fit model of xenograft growth. **G**, Number of sequenced barcodes in each xenograft.
